# Supplementary material for: The associations of parity and maternal age with small-for-gestational-age, preterm, and neonatal and infant mortality: a meta-analysis
Source: BMC Public Health. 2013 Sep 17;13(Suppl 3):S2. doi: 10.1186/1471-2458-13-S3-S2 (PMC3847520; doi:10.1186/1471-2458-13-S3-S2)
Supplement: Additional file 1 — Supplemental material. [file 1471-2458-13-S3-S2-S1.pdf]

**Supplemental Table 1: Control variables used for each study**

|                | Study                          | Socioeconomic                                                   | Maternal nutrition                             |
|----------------|--------------------------------|-----------------------------------------------------------------|------------------------------------------------|
| <b>Asia</b>    | <b>India (2000)[25]</b>        | Maternal education, land ownership, availability of electricity | Not available                                  |
|                | <b>Nepal (1999)[26]</b>        | Maternal education, ethnicity, and land ownership               | Height, Weight, MUAC                           |
|                | <b>Nepal (2003)[28]</b>        | Maternal education, land ownership                              | Height, weight                                 |
|                | <b>Nepal (2004)[27]</b>        | Maternal education, ethnicity, land ownership                   | Not available                                  |
|                | <b>Philippines (1983)[29]</b>  | Land ownership, housing structure                               | Height, MUAC, weight (at 6-7 months gestation) |
|                | <b>Thai (2001)[30]</b>         | Income quintiles                                                | Height, weight                                 |
| <b>Africa</b>  | <b>Burkina Faso (2004)[31]</b> | Maternal education, ethnicity                                   | Height, MUAC                                   |
|                | <b>Burkina Faso (2006)[34]</b> | Maternal education, ethnicity                                   | Height, MUAC                                   |
|                | <b>Tanzania (2001)[32]</b>     | ANC visits, education                                           | Height                                         |
|                | <b>Zimbabwe (1997)[33, 35]</b> | Maternal education                                              | Postpartum MUAC                                |
| <b>America</b> | <b>Brazil (1982)[21]</b>       | Income, maternal education                                      | Height, weight                                 |
|                | <b>Brazil (1993)[22]</b>       | Income, maternal education                                      | Height, weight                                 |
|                | <b>Brazil (2004)[23]</b>       | Income, maternal education                                      | Height, weight                                 |
|                | <b>Peru (1995)[24]</b>         | Maternal education, housing structure                           | Height, Weight, MUAC                           |

**Supplemental Table 2: Prevalence of adverse outcomes, by study**

| Region  | Study                   | SGA  | Preterm | Term-AGA | Term-SGA | Preterm-AGA | Preterm-SGA | Neonatal Mortality Rate** | Infant Mortality Rate** |
|---------|-------------------------|------|---------|----------|----------|-------------|-------------|---------------------------|-------------------------|
| Asia    | India (2000)[25]        | 61.5 | 13.3    | 28.4     | 58.6     | 10.2        | 2.8         | 33                        | N/A                     |
|         | Nepal (1999)[26]        | 55.7 | 22.4    | 28.1     | 50.7     | 16.3        | 4.9         | 42                        | 91                      |
|         | Nepal (2003)[28]        | 52.5 | 9.3     | 43.3     | 49.5     | 4.3         | 3.0         | 26                        | N/A                     |
|         | Nepal (2004)[27]        | 52.3 | 17.7    | 34.4     | 47.8     | 13.3        | 4.5         | 32                        | N/A                     |
|         | Philippines (1983)[29]  | 25.3 | 17.0    | 60.3     | 22.7     | 14.4        | 2.6         | 13                        | 33                      |
|         | Thai (2001)[30]         | 22.2 | 9.1     | 69.8     | 21.2     | 8.1         | 1.0         | 3                         | 6                       |
| Africa  | Burkina Faso (2004)[31] | 34.9 | 16.2    | 54.1     | 32.5     | 11.1        | 2.4         | 18                        | 62                      |
|         | Burkina Faso (2006)[34] | 29.1 | 17.7    | 59.2     | 26.3     | 11.7        | 2.7         | 19                        | N/A                     |
|         | Tanzania (2001)[32]     | 19.7 | 16.7    | 64.7     | 15.6     | 18.6        | 1.1         | 27                        | N/A                     |
|         | Zimbabwe (1997)[33, 35] | 32.8 | 7.6     | 62.6     | 29.9     | 4.7         | 2.9         | 9*                        | 78                      |
| America | Brazil (1982)[21]       | 21.1 | 5.0     | 61.7     | 12.4     | 3.9         | 1.0         | 14                        | 28                      |
|         | Brazil (1993)[22]       | 20.4 | 10.2    | 63.4     | 15.4     | 9.23        | 1.0         | 8                         | 14                      |
|         | Brazil (2004)[23]       | 16.7 | 16.1    | 63.1     | 11.8     | 14.3        | 1.7         | 12                        | 17                      |
|         | Peru (1995)[24]         | 10.8 | 5.3     | 84.6     | 10.1     | 4.7         | 0.6         | N/A                       | N/A                     |

Prevalences are calculated for the full study cohort.

\*Enrollment of newborns occurred up to 96 hours after birth, and the study may have missed neonatal deaths prior to enrollment.

\*\* Per 1000 live birth

SGA = small-for-gestational-age, defined as below the 10<sup>th</sup> percentile of the U.S. 1991 reference distribution described by Alexander and colleagues [38]. AGA = appropriate-for-gestational-age. Preterm = below 37 completed weeks of gestation

**Supplemental Table 3: Unadjusted relative risk for preterm-SGA combinations, by reproductive health risk factor categories**

|             | Nulliparous / Age <18 |      |            | Nulliparous / Age 18-<35 |      |            | Parity ≥3 / Age 18-<35 |      |            | Parity ≥3 / Age ≥35 |      |            |
|-------------|-----------------------|------|------------|--------------------------|------|------------|------------------------|------|------------|---------------------|------|------------|
| Outcome     | N*                    | RR   | 95% CI     | N*                       | RR   | 95% CI     | N*                     | RR   | 95% CI     | N*                  | RR   | 95% CI     |
| Term-SGA    | 14                    | 1.47 | 1.36, 1.60 | 14                       | 1.25 | 1.19, 1.31 | 14                     | 0.99 | 0.95, 1.02 | 13                  | 1.05 | 0.98, 1.13 |
| Preterm-AGA | 14                    | 1.74 | 1.52, 2.00 | 14                       | 1.21 | 1.06, 1.37 | 14                     | 1.12 | 0.99, 1.27 | 12                  | 1.33 | 1.15, 1.54 |
| Preterm-SGA | 11                    | 2.74 | 2.12, 3.55 | 14                       | 1.73 | 1.42, 2.12 | 13                     | 1.13 | 1.00, 1.27 | 12                  | 1.57 | 1.29, 1.91 |

\*N = Number of studies included in the meta-analysis

SGA = small-for-gestational-age, defined as below the 10<sup>th</sup> percentile of the U.S. 1991 reference distribution described by Alexander and colleagues [38]. AGA = appropriate-for-gestational-age. Preterm = below 37 completed weeks of gestation

Reference outcome = Term-AGA

Reference exposure = parity 1-2 / Age 18-<35

**Supplemental Table 4a: Comparison of adjusted odds ratios of Parity  $\geq 5$  / Age 18-<35 and Parity  $\geq 3$  / Age 18-<35 as exposures**

| Outcome                           | Parity $\geq 5$ / Age 18-<35 |      |            | Parity $\geq 3$ / Age 18-<35 |      |            |
|-----------------------------------|------------------------------|------|------------|------------------------------|------|------------|
|                                   | N                            | aOR  | 95% CI     | N                            | aOR  | 95% CI     |
| SGA (reference: AGA)              | 10                           | 0.91 | 0.76, 1.09 | 14                           | 0.92 | 0.86, 0.99 |
| Preterm (reference: Term)         | 10                           | 1.23 | 0.98, 1.54 | 14                           | 1.20 | 1.06, 1.35 |
| Term-SGA (reference: Term-AGA)    | 10                           | 0.89 | 0.77, 1.03 | 14                           | 0.88 | 0.81, 0.96 |
| Preterm-AGA (reference: Term-AGA) | 9                            | 1.09 | 0.82, 1.44 | 14                           | 1.13 | 0.98, 1.30 |
| Preterm-SGA (reference: Term-AGA) | 8                            | 1.42 | 1.01, 2.00 | 13                           | 1.07 | 0.83, 1.38 |
| Neonatal Mortality                | 6                            | 1.17 | 0.92, 1.50 | 12                           | 1.30 | 1.11, 1.51 |
| Infant Mortality                  | 3                            | 1.33 | 0.97, 1.82 | 8                            | 1.40 | 1.04, 1.89 |

**Supplemental Table 4b: Comparison of adjusted odds ratios of Parity  $\geq 5$  / Age  $\geq 35$  and Parity  $\geq 3$  / Age  $\geq 35$  as exposures**

| Outcome                           | Parity $\geq 5$ / Age $\geq 35$ |      |            | Parity $\geq 3$ / Age $\geq 35$ |      |            |
|-----------------------------------|---------------------------------|------|------------|---------------------------------|------|------------|
|                                   | N                               | aOR  | 95% CI     | N                               | aOR  | 95% CI     |
| SGA (reference: AGA)              | 9                               | 0.92 | 0.79, 1.07 | 13                              | 0.98 | 0.87, 1.09 |
| Preterm (reference: Term)         | 8                               | 1.54 | 1.25, 1.89 | 12                              | 1.43 | 1.21, 1.69 |
| Term-SGA (reference: Term-AGA)    | 9                               | 0.97 | 0.83, 1.12 | 13                              | 1.06 | 0.93, 1.20 |
| Preterm-AGA (reference: Term-AGA) | 8                               | 1.38 | 1.07, 1.77 | 12                              | 1.39 | 1.16, 1.65 |
| Preterm-SGA (reference: Term-AGA) | 7                               | 1.59 | 1.18, 2.14 | 12                              | 1.24 | 1.06, 1.44 |
| Neonatal Mortality                | 5                               | 2.01 | 1.16, 3.48 | 10                              | 1.66 | 1.23, 2.23 |
| Infant Mortality                  | 5                               | 1.40 | 0.88, 2.23 | 8                               | 1.36 | 0.92, 2.03 |

**Supplemental Table 4c: Comparison of adjusted odds ratios of nulliparous / age <16 and nulliparous / age <18 as exposures**

| Outcome                           | Nulliparous / Age <16 |      |            | Nulliparous / Age <18 |      |            |
|-----------------------------------|-----------------------|------|------------|-----------------------|------|------------|
|                                   | N                     | aOR  | 95% CI     | N                     | aOR  | 95% CI     |
| SGA (reference: AGA)              | 9                     | 1.87 | 1.33, 2.62 | 14                    | 1.80 | 1.62, 2.01 |
| Preterm (reference: Term)         | 9                     | 1.55 | 1.26, 1.91 | 14                    | 1.52 | 1.40, 1.66 |
| Term-SGA (reference: Term-AGA)    | 9                     | 2.25 | 1.36, 3.72 | 14                    | 1.81 | 1.51, 2.16 |
| Preterm-AGA (reference: Term-AGA) | 8                     | 2.56 | 1.82, 3.60 | 13                    | 1.75 | 1.56, 1.98 |
| Preterm-SGA (reference: Term-AGA) | 6                     | 5.29 | 3.35, 8.34 | 11                    | 1.06 | 0.21, 5.35 |
| Neonatal Mortality                | 6                     | 3.05 | 1.59, 5.87 | 12                    | 2.07 | 1.69, 2.54 |
| Infant Mortality                  | 4                     | 1.66 | 0.62, 4.45 | 8                     | 1.49 | 1.13, 1.97 |

Kozuki N, et al. The Associations of Parity and Maternal Age with Small-for-Gestational-Age, Preterm, and Neonatal and Infant Mortality: A Meta-analysis

SGA = small-for-gestational-age, defined as below the 10<sup>th</sup> percentile of the U.S. 1991 reference distribution described by Alexander and colleagues [38]. AGA = appropriate-for-gestational-age. Preterm = below 37 completed weeks of gestation.

Reference exposure: parity 1-2 / age 18-<35

N = Number of studies included in the meta-analysis
